# Supplementary material
Source: MDPI journal article supplement (https://www.mdpi.com/2304-6732/10/3/241)
Supplement: s1 [file s1]

## SUPPLEMENTAL TABLES

**Table S1.** 2013 CARE Checklist of information to include when writing a case report

| Section/Topic               | No. | Checklist item description                                                                             | Reported on page no. |
|-----------------------------|-----|--------------------------------------------------------------------------------------------------------|----------------------|
| Title                       | 1   | The diagnosis or intervention of primary focus followed by the words “case report”                     | p.1                  |
| Key Words                   | 2   | 2 to 5 key words that identify diagnoses or interventions in this case report, including “case report” | p.1                  |
| Abstract<br>(no references) | 3a  | Introduction: What is unique about this case and what does it add to the scientific literature?        | p.1                  |
|                             | 3b  | Main symptoms and/or important clinical findings                                                       | p.1                  |
|                             | 3c  | The main diagnoses, therapeutic interventions, and outcomes                                            | p.1                  |
|                             | 3d  | Conclusion – What is the main “take-away” lesson(s) from this case?                                    | p.1                  |
| Introduction                | 4   | One or two paragraphs summarizing why this case is unique (may include references)                     | p.2                  |
| Patient information         | 5a  | De-identified patient specific information                                                             | p.4, p.7-8           |
|                             | 5b  | Primary concerns and symptoms of the patient                                                           | p.4, p.-8            |
|                             | 5c  | Medical, family, and psycho-social history including relevant genetic information                      | p.4, p.7-8           |
|                             | 5d  | Relevant past interventions with outcomes                                                              | p.4, p.7-8           |
| Clinical Findings           | 6   | Describe significant physical examination (PE) and important clinical findings                         | p.4, p.7-8           |
| Timeline                    | 7   | Historical and current information from this episode of care organized as a timeline                   | p.4, p.7-8           |
| Diagnostic Assessment       | 8a  | Diagnostic testing (such as PE, laboratory testing, imaging, surveys)                                  | p.4, p.7-8           |
|                             | 8b  | Diagnostic challenges (such as access to testing, financial, or cultural)                              | p.4, p.7-8           |
|                             | 8c  | Diagnosis (including other diagnoses considered)                                                       | p.4, p.7-8           |
|                             | 8d  | Prognosis (such as staging in oncology) where applicable                                               | p.4, p.7-8           |
| Therapeutic Intervention    | 9a  | Types of therapeutic intervention (such as pharmacologic, surgical, preventive, self-care)             | p.5-6                |
|                             | 9b  | Administration of therapeutic intervention (such as dosage, strength, duration)                        | p.5-6                |
|                             | 9c  | Changes in therapeutic intervention (with rationale)                                                   | p.5-6                |
| Follow-up and Outcomes      | 10a | Clinician and patient-assessed outcomes (if available)                                                 | p.7-13               |
|                             | 10b | Important follow-up diagnostic and other test results                                                  | p.7-13               |
|                             | 10c | Intervention adherence and tolerability (How was this assessed?)                                       | p.10                 |
| Discussion                  | 11a | A scientific discussion of the strengths AND limitations associated with this case report              | p.14-16              |
|                             | 11b | Discussion of the relevant medical literature with references                                          | p.14-16              |
|                             | 11c | The scientific rationale for any conclusions (including assessment of possible causes)                 | p.14-16              |
|                             | 11d | The primary “take-away” lessons of this case report (without references) in a one paragraph conclusion | p.15-16              |

---

|                        |    |                                                                                                       |        |
|------------------------|----|-------------------------------------------------------------------------------------------------------|--------|
| Patient<br>Perspective | 12 | The primary should share their perspective in one to two paragraphs on the treatment(s) they received | p.9-10 |
| Informed<br>Consent    | 13 | Did the patient give informed consent? Please provide if requested                                    | p.4    |

---
